# Supplementary material for: Evidence for mass independent fractionation of even mercury isotopes in the troposphere
Source: Copernicus journal article supplement (doi:10.5194/acp-2022-284), 2022-06-01
Supplement: Supplementary file 1 [file acp-2022-284-supplement.pdf]

## **Supplementary Information for**

### **Evidence for mass independent fractionation of even mercury isotopes in the troposphere**

Shuyuan Huang<sup>1,2</sup>, Yunlong Huo<sup>1</sup>, Heng Sun<sup>1</sup>, Supeng Lv<sup>1</sup>, Yuhan Zhao<sup>1,2</sup>, Kunning  
Lin<sup>1</sup>, Yaojin Chen<sup>2</sup>, Yuanbiao Zhang<sup>1\*</sup>

*<sup>1</sup>Third Institute of Oceanography, Ministry of Natural Resources, Xiamen, Fujian  
361005, China*

*<sup>2</sup>State Key Laboratory of Marine Environmental Science, Xiamen University, Xiamen,  
Fujian 361102, China*

\*Correspondence to:

Yuanbiao Zhang (zhangyuanbiao@tio.org.cn)

1 **Supplementary Notes**

2 **Note S1: Details on preconcentration**

3

4 Dual-stage tube furnace with solution-trapping systems were installed following previous  
5 study <sup>1</sup>. Quartz fiber membranes with the collected PBM was individually installed in the first tube  
6 furnace and combusted to 1000°C within 3.0 h and maintained for 1.0 h. The second tube furnace  
7 was programmed to maintain at 1000°C during sample processing. 5 mL KMnO<sub>4</sub> trapping solution  
8 (0.1% KMnO<sub>4</sub> (m/v) + 10% H<sub>2</sub>SO<sub>4</sub> (v/v)) was utilized to capture the Hg vapor, which was released  
9 from the vent of the furnace. One trapping solution was used for preconcentration of 2-4 membranes.  
10 The Hg concentrations in the trapping solutions were measured by CVAFS following USEPA  
11 Method 1631.

12

13

14 **Note S2. Details on calculation of Hg isotopic compositions of PBM**

15

16 In order to obtain Hg isotopic compositions of PBM in MBL at higher resolution (2-4 days),  
17 isotope binary mixing model was applied for determination of Hg isotopic compositions in PBM  
18 samples with low Hg concentration, following our previous study <sup>2</sup>. In this study, the Hg  
19 concentrations of trapping solutions were lower than 1.0 ng/L. 50 µL 50 ng/mL Hg standard  
20 solutions (NIST 3133) were added to the trapping solutions to ensure sufficient Hg mass  
21 (approximately 5 ng) for isotope analysis. The Hg isotopic compositions of PBM could be calculated  
22 by the following equations:

23 
$$\delta^{xxx}\text{Hg}_{\text{PBM}} = \delta^{xxx}\text{Hg}_{\text{Mix}}/X_{\text{PBM}} \quad (1)$$

24 
$$\Delta^{xxx}\text{Hg}_{\text{PBM}} = \Delta^{xxx}\text{Hg}_{\text{Mix}}/X_{\text{PBM}} \quad (2)$$

25 
$$X_{\text{PBM}} = m_{\text{PBM}}/(m_{\text{PBM}}+m_{3133}) \quad (3)$$

26 where xxx values are 199, 200, 201, and 202 amu, Mix denote mixing solution contains trapping  
27 solution and Hg standard solution,  $X_{\text{Sam}}$  are the Hg mass fractions of the PBM in the mixing solution.  
28 The  $m_{\text{PBM}}$  and  $m_{3133}$  are the Hg mass of PBM and NIST 3133 in the mixing solution, respectively.  
29 The Hg mass of PBM could be calculated through Hg concentrations of trapping solutions, while  
30 Hg mass of NIST 3133 was 2.5 ng.

31 The uncertainties associated with equations (1) and (2) could be estimated by the following  
32 equation:

33 
$$\sigma_{\text{PBM}} = \sqrt{\frac{1}{X_{\text{PBM}}^2} \times \sigma_{\text{Mix}}^2 + \frac{d_{\text{Mix}}^2}{X_{\text{PBM}}^4} \times \sigma_X^2} \quad (4)$$

34 where  $\sigma_{\text{PBM}}$  and  $\sigma_X$  represent the 2SD values of the mixing solution and mass fractions, respectively,  
35 and  $d_{\text{Mix}}$  represents both the MDF and MIF values (including  $\delta^{202}\text{Hg}$ ,  $\Delta^{199}\text{Hg}$ ,  $\Delta^{200}\text{Hg}$ , and  $\Delta^{201}\text{Hg}$ )  
36 of the mixing solutions. The results were listed in Supplementary Table 1.

37

38

39

40 Table S1 Hg isotopic compositions of the standards and solution samples

41

| ID               | Hg<br>(ng/mL) | n  | $\delta^{202}\text{Hg}$<br>(‰) | 2SD  | $\Delta^{199}\text{Hg}$<br>(‰) | 2SD  | $\Delta^{200}\text{Hg}$<br>(‰) | 2SD  | $\Delta^{201}\text{Hg}$<br>(‰) | 2SD  |
|------------------|---------------|----|--------------------------------|------|--------------------------------|------|--------------------------------|------|--------------------------------|------|
| <i>standards</i> |               |    |                                |      |                                |      |                                |      |                                |      |
| NIST<br>3133     | 3.0           | 12 | -0.01                          | 0.06 | 0                              | 0.02 | 0                              | 0.02 | -0.01                          | 0.02 |
| NIST<br>3133     | 1.0           | 6  | -0.04                          | 0.08 | 0.01                           | 0.04 | -0.01                          | 0.04 | 0.02                           | 0.06 |
| NIST<br>8610     | 1.0           | 5  | -0.52                          | 0.12 | -0.02                          | 0.04 | 0.00                           | 0.02 | -0.05                          | 0.05 |
| <i>samples</i>   |               |    |                                |      |                                |      |                                |      |                                |      |
| 1                | 0.81          | 1  | -0.06                          | 0.12 | -0.15                          | 0.04 | 0.15                           | 0.02 | -0.18                          | 0.05 |
| 2                | 0.96          | 1  | -0.50                          | 0.12 | -0.01                          | 0.04 | 0.03                           | 0.02 | 0.02                           | 0.05 |
| 3                | 0.76          | 1  | -0.24                          | 0.12 | -0.06                          | 0.04 | 0.08                           | 0.02 | -0.07                          | 0.05 |
| 4                | 0.95          | 1  | -0.36                          | 0.12 | 0.17                           | 0.04 | 0.00                           | 0.02 | 0.13                           | 0.05 |
| 5                | 0.80          | 1  | -0.22                          | 0.12 | 0.11                           | 0.04 | 0.09                           | 0.02 | 0.13                           | 0.05 |
| 6                | 0.89          | 1  | -0.59                          | 0.12 | 0.11                           | 0.04 | 0.11                           | 0.02 | 0.05                           | 0.05 |
| 7                | 0.77          | 1  | -0.75                          | 0.12 | 0.07                           | 0.04 | 0.15                           | 0.02 | 0.12                           | 0.05 |
| 8                | 1.10          | 1  | -0.02                          | 0.12 | 0.13                           | 0.04 | 0.01                           | 0.02 | 0.06                           | 0.05 |
| 9                | 0.93          | 1  | -0.33                          | 0.12 | 0.04                           | 0.04 | -0.03                          | 0.02 | 0.03                           | 0.05 |
| 10               | 0.93          | 1  | -0.21                          | 0.12 | 0.10                           | 0.04 | 0.06                           | 0.02 | 0.12                           | 0.05 |
| 11               | 1.01          | 1  | -0.04                          | 0.12 | -0.01                          | 0.04 | 0.06                           | 0.02 | -0.01                          | 0.05 |
| 12               | 0.82          | 1  | -0.46                          | 0.12 | -0.12                          | 0.04 | 0.16                           | 0.02 | -0.13                          | 0.05 |
| 13               | 0.81          | 1  | -0.05                          | 0.12 | 0.08                           | 0.04 | -0.02                          | 0.02 | 0.08                           | 0.05 |
| 14               | 0.90          | 1  | -0.83                          | 0.12 | 0.16                           | 0.04 | 0.08                           | 0.02 | 0.15                           | 0.05 |

---

|    |      |   |       |      |       |      |       |      |       |      |
|----|------|---|-------|------|-------|------|-------|------|-------|------|
| 15 | 0.92 | 1 | -0.87 | 0.12 | 0.03  | 0.04 | 0.07  | 0.02 | 0.08  | 0.05 |
| 16 | 0.85 | 1 | -1.05 | 0.12 | -0.12 | 0.04 | -0.01 | 0.02 | -0.08 | 0.05 |
| 17 | 0.95 | 1 | -1.01 | 0.12 | -0.08 | 0.04 | 0.09  | 0.02 | -0.04 | 0.05 |
| 18 | 0.80 | 1 | -0.81 | 0.12 | -0.09 | 0.04 | 0.10  | 0.02 | -0.09 | 0.05 |
| 19 | 0.85 | 1 | -0.93 | 0.12 | 0.18  | 0.04 | 0.07  | 0.02 | 0.17  | 0.05 |
| 20 | 0.87 | 1 | -0.30 | 0.12 | 0.17  | 0.04 | 0.11  | 0.02 | 0.16  | 0.05 |
| 21 | 1.03 | 1 | -1.25 | 0.12 | 0.05  | 0.04 | 0.07  | 0.02 | 0.00  | 0.05 |
| 22 | 0.93 | 1 | -0.33 | 0.12 | 0.13  | 0.04 | 0.04  | 0.02 | 0.12  | 0.05 |
| 23 | 0.77 | 1 | 0.11  | 0.12 | 0.23  | 0.04 | 0.11  | 0.02 | 0.20  | 0.05 |
| 24 | 0.75 | 1 | -0.22 | 0.12 | 0.15  | 0.04 | -0.02 | 0.02 | 0.12  | 0.05 |
| 25 | 0.94 | 1 | -0.66 | 0.12 | -0.13 | 0.04 | 0.00  | 0.02 | -0.08 | 0.05 |
| 26 | 0.95 | 1 | -0.35 | 0.12 | -0.15 | 0.04 | -0.05 | 0.02 | -0.17 | 0.05 |
| 27 | 0.90 | 1 | -0.27 | 0.12 | 0.06  | 0.04 | -0.05 | 0.02 | 0.14  | 0.05 |
| 28 | 0.84 | 1 | -0.09 | 0.12 | 0.00  | 0.04 | 0.10  | 0.02 | -0.03 | 0.05 |
| 29 | 0.71 | 1 | -0.34 | 0.12 | -0.04 | 0.04 | 0.09  | 0.02 | -0.03 | 0.05 |
| 30 | 0.82 | 1 | -0.35 | 0.12 | 0.07  | 0.04 | 0.06  | 0.02 | 0.01  | 0.05 |
| 31 | 0.80 | 1 | -0.35 | 0.12 | 0.12  | 0.04 | 0.03  | 0.02 | 0.17  | 0.05 |
| 32 | 0.76 | 1 | -0.36 | 0.12 | 0.17  | 0.04 | 0.13  | 0.02 | 0.19  | 0.05 |
| 33 | 0.97 | 1 | -0.72 | 0.12 | -0.03 | 0.04 | 0.00  | 0.02 | -0.03 | 0.05 |
| 34 | 0.76 | 1 | -0.24 | 0.12 | 0.05  | 0.04 | 0.14  | 0.02 | 0.01  | 0.05 |
| 35 | 0.80 | 1 | -0.18 | 0.12 | 0.07  | 0.04 | 0.12  | 0.02 | 0.10  | 0.05 |
| 36 | 0.98 | 1 | -0.14 | 0.12 | 0.16  | 0.04 | 0.12  | 0.02 | 0.11  | 0.05 |
| 37 | 0.78 | 1 | -0.27 | 0.12 | -0.11 | 0.04 | -0.04 | 0.02 | -0.13 | 0.05 |
| 38 | 0.99 | 1 | -0.36 | 0.12 | -0.04 | 0.04 | 0.06  | 0.02 | -0.04 | 0.05 |
| 39 | 0.85 | 1 | -0.38 | 0.12 | 0.07  | 0.04 | 0.06  | 0.02 | 0.02  | 0.05 |
| 40 | 0.86 | 1 | -0.40 | 0.12 | -0.21 | 0.04 | 0.06  | 0.02 | -0.18 | 0.05 |

---

---

|    |      |   |       |      |       |      |       |      |       |      |
|----|------|---|-------|------|-------|------|-------|------|-------|------|
| 41 | 0.75 | 1 | 0.13  | 0.12 | 0.10  | 0.04 | 0.02  | 0.02 | 0.06  | 0.05 |
| 42 | 0.78 | 1 | -0.48 | 0.12 | 0.06  | 0.04 | 0.11  | 0.02 | 0.08  | 0.05 |
| 43 | 0.84 | 1 | -0.22 | 0.12 | 0.12  | 0.04 | 0.09  | 0.02 | 0.08  | 0.05 |
| 44 | 1.16 | 1 | -0.68 | 0.12 | 0.20  | 0.04 | 0.04  | 0.02 | 0.16  | 0.05 |
| 45 | 0.74 | 1 | -0.24 | 0.12 | 0.15  | 0.04 | 0.01  | 0.02 | 0.14  | 0.05 |
| 46 | 0.81 | 1 | -0.30 | 0.12 | -0.11 | 0.04 | 0.12  | 0.02 | -0.12 | 0.05 |
| 47 | 1.16 | 1 | -1.13 | 0.12 | -0.05 | 0.04 | -0.01 | 0.02 | -0.02 | 0.05 |
| 48 | 1.52 | 1 | -0.85 | 0.12 | -0.06 | 0.04 | 0.04  | 0.02 | -0.03 | 0.05 |
| 49 | 0.96 | 1 | -0.38 | 0.12 | -0.05 | 0.04 | 0.04  | 0.02 | -0.02 | 0.05 |
| 50 | 1.38 | 1 | -1.20 | 0.12 | 0.14  | 0.04 | 0.02  | 0.02 | 0.11  | 0.05 |
| 51 | 1.04 | 1 | -0.89 | 0.12 | 0.15  | 0.04 | 0.02  | 0.02 | 0.10  | 0.05 |
| 52 | 0.80 | 1 | 0.21  | 0.12 | -0.14 | 0.04 | 0.10  | 0.02 | -0.07 | 0.05 |

---

42  
43  
44

45 Table S2. Sampling information of PBM samples and their calculated isotopic compositions as illustrated in Supplementary Note 2

46

| ID              | Sampling period   | Longitude<br>(°E) | Latitude<br>(°N) | V (m <sup>3</sup> ) | PBM<br>(pg/m <sup>3</sup> ) | X <sub>Sam</sub> | $\delta^{202}\text{Hg}$<br>(‰) | 2SD  | $\Delta^{199}\text{Hg}$<br>(‰) | 2SD  | $\Delta^{200}\text{Hg}$<br>(‰) | 2SD  | $\Delta^{201}\text{Hg}$<br>(‰) | 2SD  |
|-----------------|-------------------|-------------------|------------------|---------------------|-----------------------------|------------------|--------------------------------|------|--------------------------------|------|--------------------------------|------|--------------------------------|------|
| <i>Cruise A</i> |                   |                   |                  |                     |                             |                  |                                |      |                                |      |                                |      |                                |      |
| 1               | 20190814-20190816 | 123.21            | 21.41            | 108.14              | 14.4                        | 0.38             | -0.15                          | 0.31 | -0.39                          | 0.11 | 0.39                           | 0.06 | -0.46                          | 0.14 |
| 2               | 20190816-20190818 | 129.25            | 21.89            | 103.26              | 22.3                        | 0.48             | -1.04                          | 0.26 | -0.03                          | 0.08 | 0.07                           | 0.04 | 0.04                           | 0.10 |
| 3               | 20190818-20190820 | 135.46            | 22.99            | 100.02              | 13.2                        | 0.35             | -0.70                          | 0.35 | -0.18                          | 0.12 | 0.24                           | 0.06 | -0.20                          | 0.15 |
| 4               | 20190820-20190822 | 143.76            | 24.09            | 102.20              | 22.3                        | 0.48             | -0.76                          | 0.26 | 0.35                           | 0.09 | 0.00                           | 0.04 | 0.28                           | 0.11 |
| 5               | 20190822-20190824 | 151.55            | 24.74            | 102.24              | 14.5                        | 0.37             | -0.60                          | 0.33 | 0.30                           | 0.11 | 0.24                           | 0.06 | 0.35                           | 0.14 |
| 6               | 20190824-20190826 | 156.50            | 23.97            | 106.15              | 18.2                        | 0.44             | -1.35                          | 0.29 | 0.25                           | 0.09 | 0.25                           | 0.05 | 0.11                           | 0.11 |
| 7               | 20190826-20190828 | 157.96            | 20.56            | 108.78              | 12.6                        | 0.35             | -2.12                          | 0.38 | 0.19                           | 0.11 | 0.42                           | 0.07 | 0.34                           | 0.14 |
| 8               | 20190828-20190901 | 160.25            | 15.17            | 142.38              | 21.1                        | 0.55             | -0.03                          | 0.22 | 0.23                           | 0.07 | 0.02                           | 0.04 | 0.11                           | 0.09 |
| 9               | 20190904-20190908 | 167.99            | 19.50            | 149.40              | 14.5                        | 0.46             | -0.71                          | 0.26 | 0.08                           | 0.09 | -0.07                          | 0.04 | 0.06                           | 0.11 |
| 10              | 20190910-20190912 | 175.46            | 16.44            | 201.40              | 10.6                        | 0.46             | -0.45                          | 0.26 | 0.22                           | 0.09 | 0.13                           | 0.04 | 0.26                           | 0.11 |
| 11              | 20190912-20190915 | 179.99            | 17.80            | 160.51              | 15.9                        | 0.51             | -0.08                          | 0.24 | -0.03                          | 0.08 | 0.13                           | 0.04 | -0.02                          | 0.10 |
| 12              | 20190915-20190917 | 179.99            | 22.79            | 104.54              | 15.2                        | 0.39             | -1.19                          | 0.32 | -0.32                          | 0.11 | 0.42                           | 0.06 | -0.34                          | 0.13 |
| 13              | 20190917-20190920 | 177.49            | 24.00            | 136.12              | 11.4                        | 0.38             | -0.13                          | 0.31 | 0.20                           | 0.11 | -0.04                          | 0.05 | 0.20                           | 0.13 |
| 14              | 20190920-20190922 | 174.99            | 20.98            | 110.97              | 17.8                        | 0.44             | -1.87                          | 0.30 | 0.37                           | 0.09 | 0.19                           | 0.05 | 0.34                           | 0.12 |
| 15              | 20190922-20190924 | 174.93            | 16.95            | 112.86              | 18.7                        | 0.46             | -1.90                          | 0.29 | 0.06                           | 0.09 | 0.14                           | 0.04 | 0.17                           | 0.11 |
| 16              | 20190924-20190926 | 170.65            | 13.64            | 102.58              | 17.2                        | 0.41             | -2.53                          | 0.34 | -0.30                          | 0.10 | -0.02                          | 0.05 | -0.19                          | 0.12 |
| 17              | 20190926-20190929 | 158.65            | 7.33             | 157.06              | 14.3                        | 0.47             | -2.15                          | 0.29 | -0.16                          | 0.09 | 0.19                           | 0.04 | -0.08                          | 0.11 |
| 18              | 20190929-20191002 | 158.20            | 7.00             | 173.33              | 8.8                         | 0.38             | -2.15                          | 0.36 | -0.23                          | 0.11 | 0.26                           | 0.06 | -0.24                          | 0.13 |
| 19              | 20191002-20191004 | 162.49            | 9.78             | 103.78              | 16.7                        | 0.41             | -2.28                          | 0.34 | 0.45                           | 0.10 | 0.17                           | 0.05 | 0.42                           | 0.13 |
| 20              | 20191004-20191006 | 170.58            | 13.97            | 106.49              | 17.3                        | 0.42             | -0.70                          | 0.29 | 0.40                           | 0.10 | 0.27                           | 0.05 | 0.38                           | 0.12 |
| 21              | 20191006-20191008 | 178.02            | 16.69            | 111.56              | 24.0                        | 0.52             | -2.42                          | 0.27 | 0.09                           | 0.08 | 0.13                           | 0.04 | 0.00                           | 0.10 |

|                 |                   |         |       |        |      |      |       |      |       |      |       |      |       |      |
|-----------------|-------------------|---------|-------|--------|------|------|-------|------|-------|------|-------|------|-------|------|
| 22              | 20191008-20191010 | -174.14 | 19.23 | 110.40 | 19.5 | 0.46 | -0.70 | 0.26 | 0.28  | 0.09 | 0.08  | 0.04 | 0.26  | 0.11 |
| 23              | 20191010-20191012 | -165.97 | 20.50 | 110.35 | 12.3 | 0.35 | 0.32  | 0.34 | 0.67  | 0.13 | 0.31  | 0.06 | 0.56  | 0.15 |
| 24              | 20191012-20191015 | -166.01 | 20.50 | 159.57 | 8.0  | 0.34 | -0.64 | 0.36 | 0.44  | 0.12 | -0.06 | 0.06 | 0.36  | 0.15 |
| 25              | 20191015-20191017 | -173.01 | 20.50 | 87.93  | 25.3 | 0.47 | -1.41 | 0.27 | -0.27 | 0.09 | -0.01 | 0.04 | -0.17 | 0.11 |
| 26              | 20191017-20191019 | 179.99  | 20.49 | 105.13 | 21.3 | 0.47 | -0.74 | 0.26 | -0.32 | 0.09 | -0.10 | 0.04 | -0.36 | 0.11 |
| 27              | 20191020-20191023 | 172.93  | 21.25 | 183.12 | 11.0 | 0.45 | -0.60 | 0.27 | 0.12  | 0.09 | -0.11 | 0.05 | 0.31  | 0.11 |
| 28              | 20191023-20191025 | 169.99  | 23.51 | 107.13 | 15.8 | 0.40 | -0.22 | 0.30 | 0.01  | 0.10 | 0.24  | 0.05 | -0.07 | 0.12 |
| 29              | 20191025-20191026 | 166.85  | 23.47 | 66.58  | 16.1 | 0.30 | -1.14 | 0.42 | -0.15 | 0.13 | 0.29  | 0.07 | -0.09 | 0.17 |
| 30              | 20191026-20191029 | 160.73  | 21.23 | 156.56 | 10.3 | 0.39 | -0.88 | 0.31 | 0.18  | 0.10 | 0.14  | 0.05 | 0.03  | 0.13 |
| 31              | 20191029-20191031 | 153.24  | 20.76 | 110.55 | 13.6 | 0.37 | -0.95 | 0.33 | 0.33  | 0.11 | 0.09  | 0.05 | 0.45  | 0.14 |
| 32              | 20191031-20191102 | 143.82  | 21.28 | 110.06 | 12.0 | 0.35 | -1.03 | 0.36 | 0.50  | 0.12 | 0.37  | 0.07 | 0.55  | 0.15 |
| 33              | 20191102-20191104 | 133.26  | 22.13 | 95.28  | 24.8 | 0.49 | -1.47 | 0.26 | -0.07 | 0.08 | 0.00  | 0.04 | -0.06 | 0.10 |
| <i>Cruise B</i> |                   |         |       |        |      |      |       |      |       |      |       |      |       |      |
| 34              | 20180514-20180516 | 134.63  | 21.00 | 144.00 | 8.9  | 0.34 | -0.71 | 0.36 | 0.15  | 0.12 | 0.40  | 0.07 | 0.02  | 0.15 |
| 35              | 20180516-20180520 | 146.49  | 23.50 | 98.00  | 15.4 | 0.38 | -0.48 | 0.32 | 0.19  | 0.11 | 0.32  | 0.06 | 0.27  | 0.13 |
| 36              | 20180520-20180523 | 146.50  | 28.50 | 144.00 | 16.7 | 0.49 | -0.29 | 0.25 | 0.33  | 0.08 | 0.24  | 0.04 | 0.22  | 0.10 |
| 37              | 20180523-20180525 | 146.55  | 33.02 | 94.93  | 14.6 | 0.36 | -0.75 | 0.34 | -0.31 | 0.12 | -0.11 | 0.06 | -0.35 | 0.14 |
| 38              | 20180525-20180527 | 146.55  | 37.02 | 95.85  | 25.7 | 0.50 | -0.73 | 0.25 | -0.08 | 0.08 | 0.11  | 0.04 | -0.08 | 0.10 |
| 39              | 20180527-20180529 | 149.24  | 37.00 | 96.23  | 18.1 | 0.41 | -0.92 | 0.30 | 0.16  | 0.10 | 0.15  | 0.05 | 0.05  | 0.12 |
| 40              | 20180529-20180604 | 139.72  | 30.36 | 144.00 | 12.4 | 0.42 | -0.95 | 0.30 | -0.50 | 0.10 | 0.15  | 0.05 | -0.43 | 0.12 |
| <i>Cruise C</i> |                   |         |       |        |      |      |       |      |       |      |       |      |       |      |
| 41              | 20190813-20190815 | 123.15  | 34.52 | 110.59 | 11.5 | 0.34 | 0.39  | 0.36 | 0.30  | 0.12 | 0.07  | 0.06 | 0.18  | 0.15 |
| 42              | 20190815-20190817 | 129.83  | 35.72 | 110.59 | 12.7 | 0.36 | -1.34 | 0.35 | 0.16  | 0.11 | 0.31  | 0.06 | 0.22  | 0.14 |
| 43              | 20190817-20190819 | 137.46  | 42.12 | 58.75  | 29.1 | 0.41 | -0.55 | 0.30 | 0.30  | 0.10 | 0.23  | 0.05 | 0.19  | 0.12 |
| 44              | 20190819-20190821 | 147.31  | 47.73 | 83.38  | 39.6 | 0.57 | -1.19 | 0.22 | 0.35  | 0.07 | 0.06  | 0.04 | 0.28  | 0.09 |
| 45              | 20190821-20190823 | 158.35  | 50.97 | 84.67  | 14.0 | 0.32 | -0.76 | 0.38 | 0.48  | 0.13 | 0.02  | 0.06 | 0.43  | 0.16 |



---

|    |                   |         |       |        |      |      |       |      |       |      |       |      |       |      |
|----|-------------------|---------|-------|--------|------|------|-------|------|-------|------|-------|------|-------|------|
| 46 | 20190823-20190825 | 168.99  | 54.44 | 49.68  | 31.1 | 0.38 | -0.78 | 0.32 | -0.28 | 0.11 | 0.32  | 0.06 | -0.31 | 0.13 |
| 47 | 20190825-20190827 | 176.53  | 57.67 | 51.84  | 63.4 | 0.57 | -1.99 | 0.24 | -0.09 | 0.07 | -0.02 | 0.04 | -0.04 | 0.09 |
| 48 | 20190827-20190829 | -176.79 | 61.36 | 103.68 | 49.2 | 0.67 | -1.27 | 0.19 | -0.09 | 0.06 | 0.06  | 0.03 | -0.04 | 0.07 |
| 49 | 20190829-20190831 | -170.37 | 67.32 | 51.84  | 44.2 | 0.48 | -0.78 | 0.26 | -0.11 | 0.08 | 0.09  | 0.04 | -0.04 | 0.10 |
| 50 | 20190831-20190902 | -170.39 | 73.34 | 103.68 | 42.6 | 0.64 | -1.88 | 0.21 | 0.22  | 0.06 | 0.03  | 0.03 | 0.17  | 0.08 |
| 51 | 20190902-20190905 | -170.49 | 71.88 | 103.68 | 25.9 | 0.52 | -1.71 | 0.25 | 0.29  | 0.08 | 0.04  | 0.04 | 0.19  | 0.10 |
| 52 | 20190905-20190909 | -169.23 | 64.78 | 82.08  | 18.0 | 0.37 | 0.57  | 0.33 | -0.38 | 0.11 | 0.27  | 0.06 | -0.18 | 0.14 |

---

47

48

49 Table S3 Parameter settings in HYSPLIT model  
 50

| Parameters                                             | Values                  |
|--------------------------------------------------------|-------------------------|
| Number of Trajectory Starting Locations                | 1                       |
| Type of Trajectory                                     | Frequency               |
| Trajectory Direction                                   | Backward                |
| Vertical Motion                                        | Model vertical velocity |
| Total run time (h)                                     | 120 (48)*               |
| Number of days to calculate trajectory frequencies (d) | 5 (2)*                  |
| Trajectory frequency grid resolution (deg.)            | 0.50                    |
| Trajectory starting interval (h)                       | 3                       |
| Height (meters AGL)                                    | 500                     |
| Plot resolution (dpi)                                  | 96                      |
| Zoom factor                                            | 70                      |

51

52 Table S4. Frequencies of height of backward trajectories of air mass

| ID | $f_{3000}$ (%) | $f_{1500}$ (%) | $f_{500}$ (%) | $f_{3000\_light}$ (%) | $f_{1500\_light}$ (%) | $f_{500\_light}$ (%) |
|----|----------------|----------------|---------------|-----------------------|-----------------------|----------------------|
| 1  | 5.27           | 20.78          | 28.06         | 3.06                  | 12.24                 | 17.30                |
| 2  | 10.13          | 19.73          | 35.23         | 5.91                  | 11.81                 | 21.10                |
| 3  | 0.00           | 0.00           | 6.65          | 0.00                  | 0.00                  | 4.01                 |
| 4  | 2.00           | 14.56          | 23.63         | 1.27                  | 8.76                  | 13.71                |
| 5  | 0.00           | 0.42           | 18.57         | 0.00                  | 0.11                  | 10.65                |
| 6  | 0.00           | 0.42           | 35.97         | 0.00                  | 0.00                  | 21.10                |
| 7  | 0.00           | 10.34          | 29.22         | 0.00                  | 5.91                  | 16.56                |
| 8  | 0.00           | 0.21           | 17.19         | 0.00                  | 0.00                  | 10.13                |
| 9  | 2.64           | 18.99          | 35.02         | 1.48                  | 11.08                 | 20.25                |
| 10 | 0.00           | 0.00           | 11.60         | 0.00                  | 0.00                  | 6.33                 |
| 11 | 0.00           | 0.00           | 10.97         | 0.00                  | 0.00                  | 6.43                 |
| 12 | 9.05           | 24.37          | 44.83         | 5.43                  | 13.92                 | 26.16                |
| 13 | 6.82           | 28.80          | 48.42         | 3.83                  | 16.35                 | 28.59                |
| 14 | 1.60           | 6.86           | 13.40         | 1.17                  | 4.43                  | 8.33                 |
| 15 | 0.00           | 0.00           | 14.98         | 0.00                  | 0.00                  | 9.39                 |
| 16 | 0.00           | 0.00           | 10.55         | 0.00                  | 0.00                  | 6.33                 |
| 17 | 0.00           | 8.86           | 14.03         | 0.00                  | 5.38                  | 8.33                 |
| 18 | 0.00           | 0.00           | 0.00          | 0.00                  | 0.00                  | 0.00                 |
| 19 | 0.00           | 0.00           | 0.00          | 0.00                  | 0.00                  | 0.00                 |
| 20 | 0.00           | 0.00           | 5.27          | 0.00                  | 0.00                  | 2.53                 |
| 21 | 2.74           | 18.67          | 34.07         | 1.90                  | 10.55                 | 19.41                |
| 22 | 4.22           | 13.19          | 36.60         | 2.64                  | 7.28                  | 22.26                |
| 23 | 11.18          | 16.35          | 32.07         | 6.01                  | 9.39                  | 19.09                |
| 24 | 23.52          | 39.14          | 57.17         | 13.40                 | 22.47                 | 32.81                |
| 25 | 15.82          | 42.62          | 55.70         | 8.86                  | 25.21                 | 32.38                |
| 26 | 4.43           | 32.91          | 51.79         | 2.11                  | 19.09                 | 30.27                |
| 27 | 0.00           | 3.59           | 22.26         | 0.00                  | 2.43                  | 12.55                |
| 28 | 4.64           | 8.97           | 21.73         | 2.85                  | 5.17                  | 11.71                |
| 29 | 4.43           | 10.86          | 32.81         | 2.53                  | 6.01                  | 19.62                |
| 30 | 4.43           | 13.08          | 24.89         | 2.64                  | 7.81                  | 15.19                |
| 31 | 3.27           | 7.59           | 17.62         | 1.48                  | 4.32                  | 10.02                |
| 32 | 0.00           | 8.44           | 32.38         | 0.00                  | 4.01                  | 18.46                |
| 33 | 0.00           | 6.65           | 13.29         | 0.00                  | 3.48                  | 7.49                 |
| 34 | 0.00           | 0.00           | 18.25         | 0.00                  | 0.00                  | 13.08                |
| 35 | 0.00           | 0.00           | 0.00          | 0.00                  | 0.00                  | 0.00                 |
| 36 | 0.00           | 30.38          | 46.73         | 0.00                  | 21.52                 | 33.44                |
| 37 | 8.65           | 29.11          | 52.22         | 5.91                  | 20.78                 | 36.60                |
| 38 | 18.04          | 34.60          | 46.31         | 12.55                 | 24.05                 | 32.38                |
| 39 | 22.78          | 31.86          | 50.32         | 15.82                 | 22.05                 | 35.44                |
| 40 | 29.64          | 34.81          | 50.11         | 20.78                 | 24.26                 | 35.34                |
| 41 | 37.97          | 68.46          | 84.49         | 26.79                 | 47.36                 | 59.60                |
| 42 | 16.35          | 52.64          | 75.11         | 11.50                 | 36.39                 | 53.16                |
| 43 | 18.04          | 48.52          | 69.51         | 12.66                 | 34.60                 | 49.47                |
| 44 | 11.18          | 28.16          | 65.93         | 8.02                  | 20.25                 | 46.10                |
| 45 | 0.00           | 33.12          | 66.24         | 0.00                  | 26.16                 | 52.11                |
| 46 | 0.00           | 29.54          | 56.22         | 0.00                  | 23.21                 | 43.57                |
| 47 | 0.00           | 10.76          | 59.39         | 0.00                  | 8.02                  | 46.31                |
| 48 | 4.01           | 22.78          | 48.63         | 2.53                  | 17.51                 | 37.55                |
| 49 | 3.48           | 23.73          | 53.27         | 3.48                  | 23.73                 | 53.27                |
| 50 | 0.00           | 10.55          | 27.64         | 0.00                  | 10.55                 | 27.64                |
| 51 | 0.00           | 0.00           | 10.76         | 0.00                  | 0.00                  | 10.76                |
| 52 | 16.24          | 27.22          | 32.49         | 16.24                 | 27.22                 | 32.49                |

54 Table S5. The isotopic compositions of three end-members of troposphere photochemical reactions,  
 55 GEM oxidation, and photoreduction.  
 56

| Sample ID                              | $\Delta^{199}\text{Hg}$ (‰) | 2SD  | $\Delta^{200}\text{Hg}$ (‰) | 2SD  | references |
|----------------------------------------|-----------------------------|------|-----------------------------|------|------------|
| PBM samples dominated by GEM oxidation |                             |      |                             |      |            |
| GKD41                                  | -0.37                       | 0.08 | 0.00                        | 0.07 |            |
| GKD351                                 | -0.58                       | 0.08 | 0.05                        | 0.07 | 3          |
| GKD353                                 | -0.85                       | 0.08 | 0.03                        | 0.07 |            |
| GKD355                                 | -0.80                       | 0.08 | 0.01                        | 0.07 |            |
| AE-TPM-03                              | -0.33                       | 0.07 | 0.06                        | 0.06 |            |
| AE-TPM-04                              | -0.41                       | 0.07 | 0.08                        | 0.06 |            |
| AE-TPM-05                              | -0.38                       | 0.07 | 0                           | 0.06 |            |
| AE-TPM-08                              | -0.42                       | 0.07 | -0.06                       | 0.06 |            |
| BW-TPM-03                              | -0.65                       | 0.07 | 0.03                        | 0.06 | 1          |
| BW-TPM-04                              | -0.38                       | 0.07 | 0.06                        | 0.06 |            |
| BE-TPM-09                              | -0.43                       | 0.07 | 0.04                        | 0.06 |            |
| BE-TPM-10                              | -0.45                       | 0.07 | 0.02                        | 0.06 |            |
| BE-TPM-12                              | -0.54                       | 0.07 | 0.05                        | 0.06 |            |
| DW-TPM-05                              | -0.35                       | 0.07 | 0.07                        | 0.06 |            |
| Sept-28-D                              | -0.48                       | 0.06 | 0.02                        | 0.04 |            |
| Sept-28-N                              | -0.46                       | 0.06 | 0.01                        | 0.04 | 4          |
| Oct-5-D                                | -0.53                       | 0.06 | 0.09                        | 0.04 |            |
| Oct-5-N                                | -0.51                       | 0.06 | 0.06                        | 0.04 |            |
| Hg2-6, 2014                            | -0.34                       | 0.07 | -0.01                       | 0.06 |            |
| Hg7, 2014                              | -0.42                       | 0.07 | -0.03                       | 0.06 | 5          |
| Hg8, 2014                              | -0.71                       | 0.07 | -0.01                       | 0.06 |            |
| Hg9-13, 2014                           | -0.34                       | 0.07 | 0.02                        | 0.06 |            |
| ZSS-47                                 | -0.32                       | N.A. | 0.05                        | N.A. |            |
| ZSS-48                                 | -0.35                       | N.A. | -0.01                       | N.A. |            |
| ZSS-51                                 | -0.4                        | N.A. | -0.01                       | N.A. |            |
| ZSS-52                                 | -0.37                       | N.A. | -0.01                       | N.A. |            |
| ZSS-53                                 | -0.76                       | N.A. | -0.06                       | N.A. |            |
| ZSS-54                                 | -0.45                       | N.A. | -0.05                       | N.A. |            |
| ZSS-55                                 | -0.59                       | N.A. | -0.02                       | N.A. |            |
| ZSS-56                                 | -0.39                       | N.A. | -0.02                       | N.A. |            |
| ZSS-57                                 | -0.6                        | N.A. | -0.03                       | N.A. |            |
| ZSS-58                                 | -0.49                       | N.A. | -0.04                       | N.A. |            |
| ZSS-61                                 | -0.72                       | N.A. | -0.03                       | N.A. |            |
| ZSS-62                                 | -0.6                        | N.A. | -0.05                       | N.A. |            |
| ZSS-64                                 | -0.59                       | N.A. | 0.03                        | N.A. |            |
| ZSS-65                                 | -0.47                       | N.A. | -0.09                       | N.A. |            |
| ZSS-66                                 | -0.32                       | N.A. | -0.01                       | N.A. | 6          |
| ZSS-68                                 | -0.43                       | N.A. | -0.04                       | N.A. |            |
| ZSS-75                                 | -0.45                       | N.A. | 0                           | N.A. |            |
| ZSS-76                                 | -0.41                       | N.A. | 0.02                        | N.A. |            |
| ZSS-77                                 | -0.34                       | N.A. | -0.01                       | N.A. |            |
| ZSS-79                                 | -0.37                       | N.A. | -0.02                       | N.A. |            |
| ZSS-81                                 | -0.36                       | N.A. | -0.04                       | N.A. |            |
| ZSS-82                                 | -0.33                       | N.A. | -0.02                       | N.A. |            |
| ZSS-84                                 | -0.31                       | N.A. | 0.08                        | N.A. |            |
| ZSS-85                                 | -0.5                        | N.A. | -0.04                       | N.A. |            |
| ZSS-86                                 | -0.37                       | N.A. | -0.04                       | N.A. |            |
| ZSS-87                                 | -0.4                        | N.A. | -0.04                       | N.A. |            |
| ZSS-89                                 | -0.37                       | N.A. | -0.09                       | N.A. |            |
| ZSS-91                                 | -0.37                       | N.A. | -0.05                       | N.A. |            |
| ZSS-92                                 | -0.36                       | N.A. | -0.05                       | N.A. |            |
| 16                                     | -0.30                       | 0.10 | -0.02                       | 0.05 | this study |

|                                                              |              |      |              |      |   |
|--------------------------------------------------------------|--------------|------|--------------|------|---|
| 25                                                           | -0.27        | 0.09 | -0.01        | 0.04 |   |
| 26                                                           | -0.32        | 0.09 | -0.10        | 0.04 |   |
| 37                                                           | -0.31        | 0.12 | -0.11        | 0.06 |   |
| <b>mean</b>                                                  | <b>-0.45</b> |      | <b>-0.01</b> |      |   |
| <b>sd</b>                                                    | <b>0.14</b>  |      | <b>0.05</b>  |      |   |
| PBM samples dominated by photoreduction                      |              |      |              |      |   |
| MCB_PBM-35                                                   | 0.85         | 0.09 | 0.09         | 0.08 |   |
| MCB_PBM-37                                                   | 0.68         | 0.09 | 0.08         | 0.08 |   |
| MCB_PBM-38                                                   | 0.66         | 0.09 | 0.08         | 0.08 |   |
| MCB_PBM-39                                                   | 1.15         | 0.09 | 0.09         | 0.08 |   |
| MAL_PBM-3                                                    | 0.82         | 0.09 | 0.09         | 0.08 | 7 |
| MAL_PBM-13                                                   | 0.86         | 0.09 | 0.05         | 0.08 |   |
| MAL_PBM-18                                                   | 0.76         | 0.09 | 0.05         | 0.08 |   |
| MAL_PBM-20                                                   | 1.07         | 0.09 | 0.08         | 0.08 |   |
| MAL_PBM-24                                                   | 0.81         | 0.09 | 0.07         | 0.08 |   |
| HNI-PBM-16                                                   | 0.68         | 0.09 | 0.06         | 0.08 |   |
| <b>mean</b>                                                  | <b>0.83</b>  |      | <b>0.07</b>  |      |   |
| <b>sd</b>                                                    | <b>0.16</b>  |      | <b>0.02</b>  |      |   |
| PBM samples dominated by troposphere photochemical reactions |              |      |              |      |   |
| 1                                                            | -0.29        | 0.04 | 1.24         | 0.08 |   |
| 12                                                           | 0.36         | 0.01 | 1.21         | 0.10 | 8 |
| 46                                                           | 0.47         | 0.06 | 1.18         | 0.09 |   |
| <b>mean</b>                                                  | <b>0.18</b>  |      | <b>1.21</b>  |      |   |
| <b>sd</b>                                                    | <b>0.41</b>  |      | <b>0.03</b>  |      |   |

57 N.A.: Not available.  
58

59 Table S6 Estimated contribution of photoreduction based on the ratios of  $\Delta^{199}\text{Hg}/\Delta^{200}\text{Hg}$  (k).  
60

| GEM*                            |                                |                                | PBM |                                |                                | k    | $f_{\text{red}}$<br>(%) | altitudes/references |
|---------------------------------|--------------------------------|--------------------------------|-----|--------------------------------|--------------------------------|------|-------------------------|----------------------|
| n                               | $\Delta^{199}\text{Hg}$<br>(‰) | $\Delta^{200}\text{Hg}$<br>(‰) | n   | $\Delta^{199}\text{Hg}$<br>(‰) | $\Delta^{200}\text{Hg}$<br>(‰) |      |                         |                      |
| precipitation                   |                                |                                |     |                                |                                |      |                         |                      |
| 7                               | -0.09±0.09                     | -0.04±0.04                     | 20  | 0.30±0.14                      | 0.16±0.06                      | 1.87 | 55                      | 9                    |
| 208                             | -0.20±0.08                     | -0.06±0.06                     | 19  | 0.59±0.25                      | 0.39±0.24                      | 1.79 | 53                      | 8                    |
| 208                             | -0.20±0.08                     | -0.06±0.06                     | 26  | 0.35±0.21                      | 0.07±0.04                      | 4.32 | 82                      | 10                   |
| 3                               | -0.19±0.03                     | -0.10±0.02                     | 5   | 0.48±0.27                      | 0.18±0.05                      | 2.39 | 65                      | 11                   |
| 208                             | -0.20±0.08                     | -0.06±0.06                     | 45  | 0.25±0.19                      | 0.11±0.07                      | 2.72 | 69                      | 12                   |
| 208                             | -0.20±0.08                     | -0.06±0.06                     | 16  | 0.68±0.38                      | 0.08±0.06                      | 6.40 | 90                      | 13                   |
| 208                             | -0.20±0.08                     | -0.06±0.06                     | 18  | 0.04±0.15                      | 0.11±0.05                      | 1.49 | 45                      | 1                    |
| PBM collected in high latitudes |                                |                                |     |                                |                                |      |                         |                      |
| 208                             | -0.20±0.08                     | -0.06±0.06                     | 7   | -0.07±0.12                     | 0.03±0.03                      | 1.60 | 48                      | 550 m <sup>14</sup>  |
| 208                             | -0.20±0.08                     | -0.06±0.06                     | 21  | 0.35±0.34                      | 0.08±0.04                      | 4.17 | 82                      | 50 m <sup>7</sup>    |
| 208                             | -0.20±0.08                     | -0.06±0.06                     | 36  | 0.66±0.32                      | 0.09±0.05                      | 6.04 | 89                      | 2450 m <sup>7</sup>  |
| 208                             | -0.20±0.08                     | -0.06±0.06                     | 39  | 0.36±0.34                      | 0.10±0.04                      | 3.73 | 79                      | 741 m <sup>7</sup>   |
| 208                             | -0.20±0.08                     | -0.06±0.06                     | 25  | 0.27±0.22                      | 0.07±0.03                      | 3.89 | 80                      | 3816 m <sup>7</sup>  |

61 \* The mean GEM isotope compositions compiled from the literatures are used if there is no  
62 corresponding GEM isotope data reported in the references. The uncertainties are SD.  
63

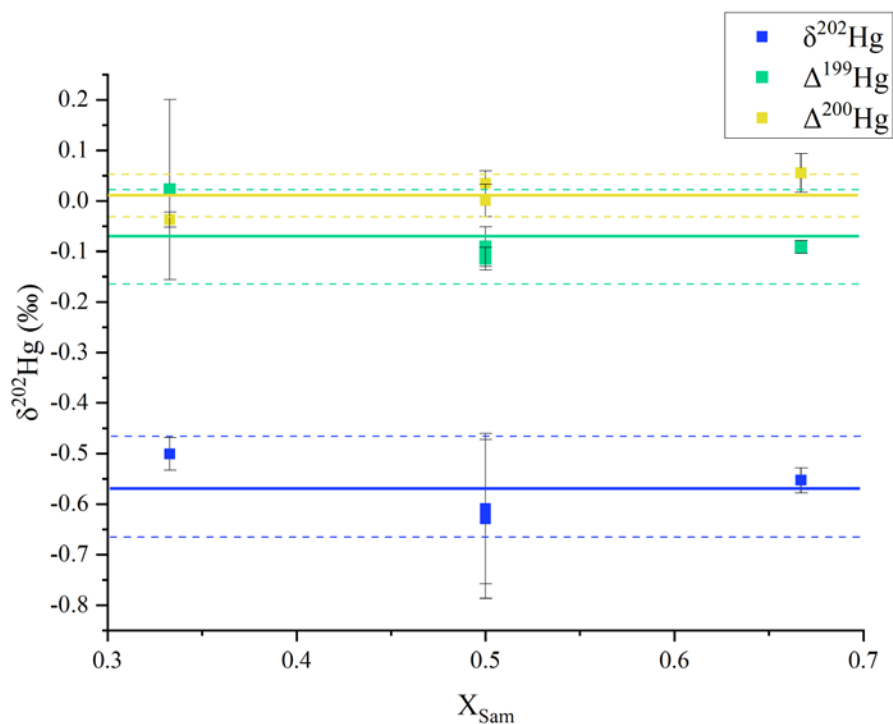

64  
 65 Figure S1. Calculated isotopic compositions of NIST 8610 when mixed with different  
 66 proportions of NIST 3133. The bold and dashed lines represent the average and the  $\pm 1\text{SD}$   
 67 interval determined from all calculations, respectively.  
 68  
 69







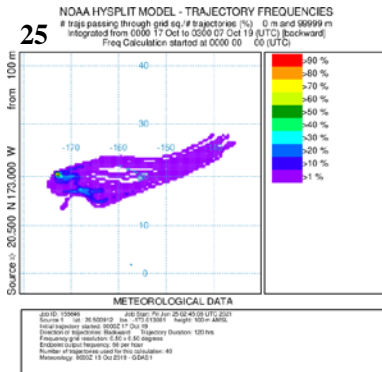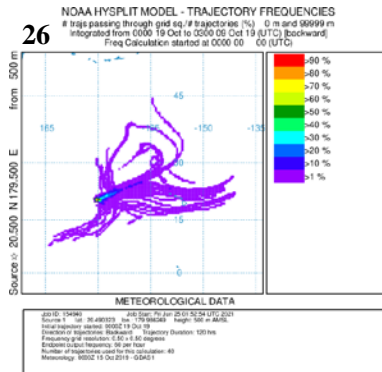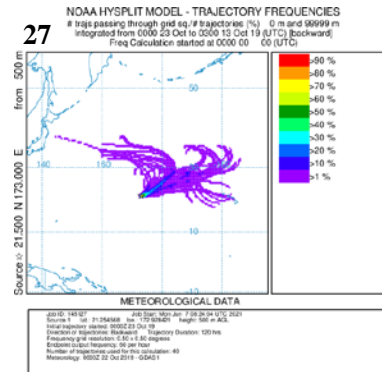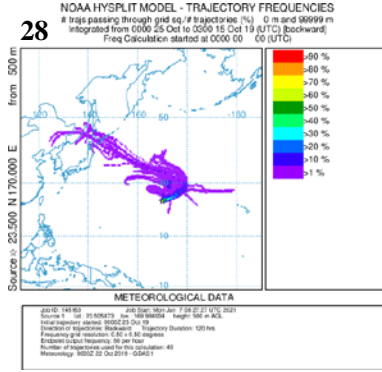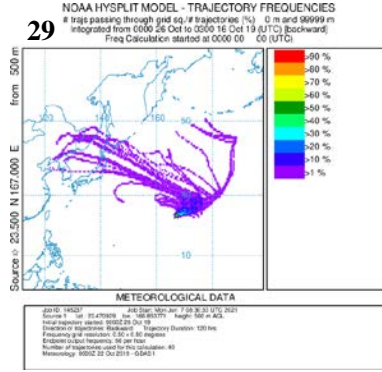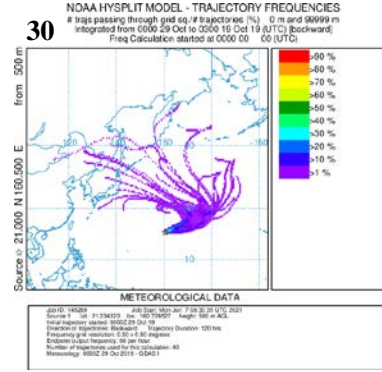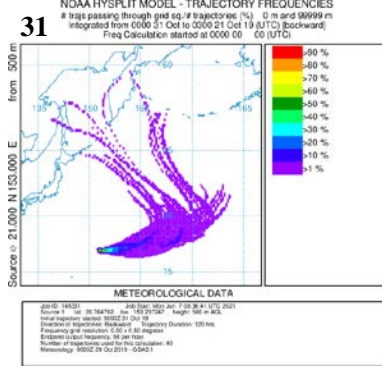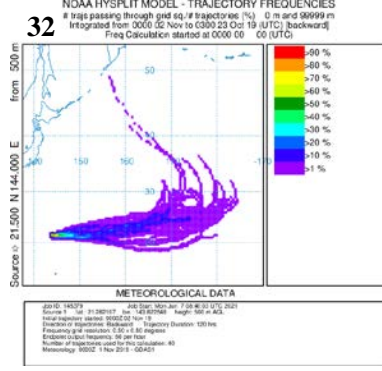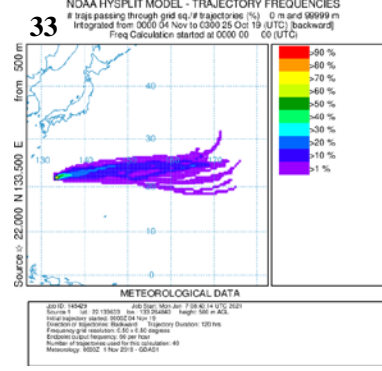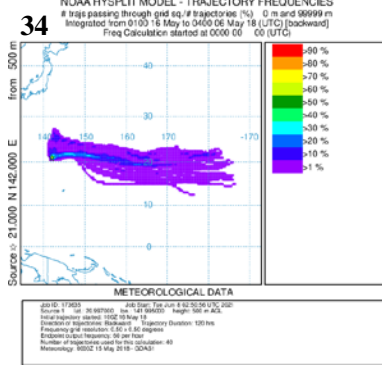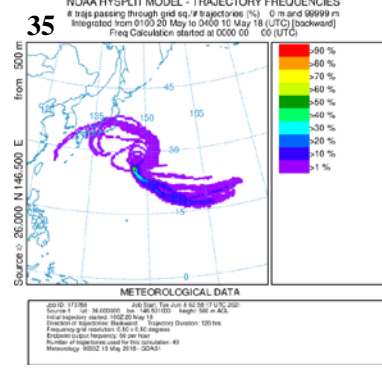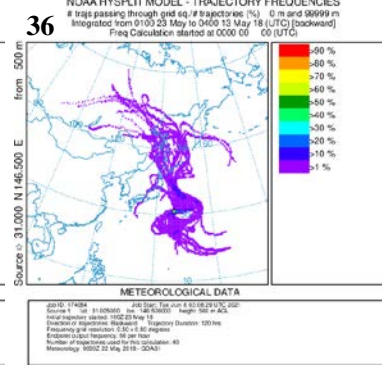

79  
80



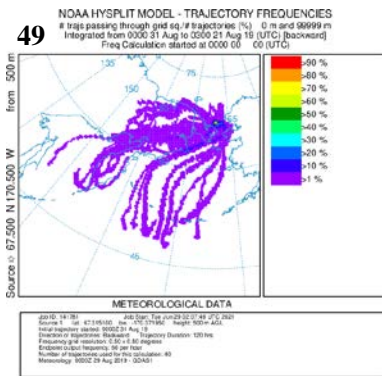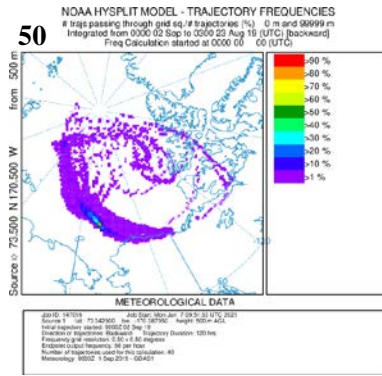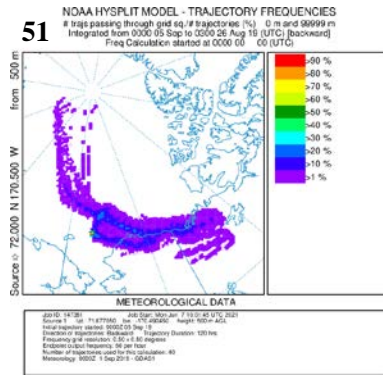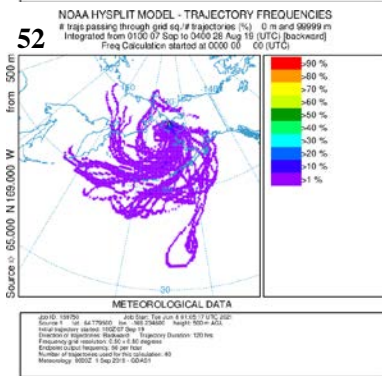

88  
 89  
 90  
 91  
 92  
 93  
 94  
 95  
 96  
 97  
 98  
 99  
 100  
 101  
 102  
 103

Figure S2. Trajectory frequency analysis showing the air mass arriving at each sampling site. Number in the top left represents sample ID.

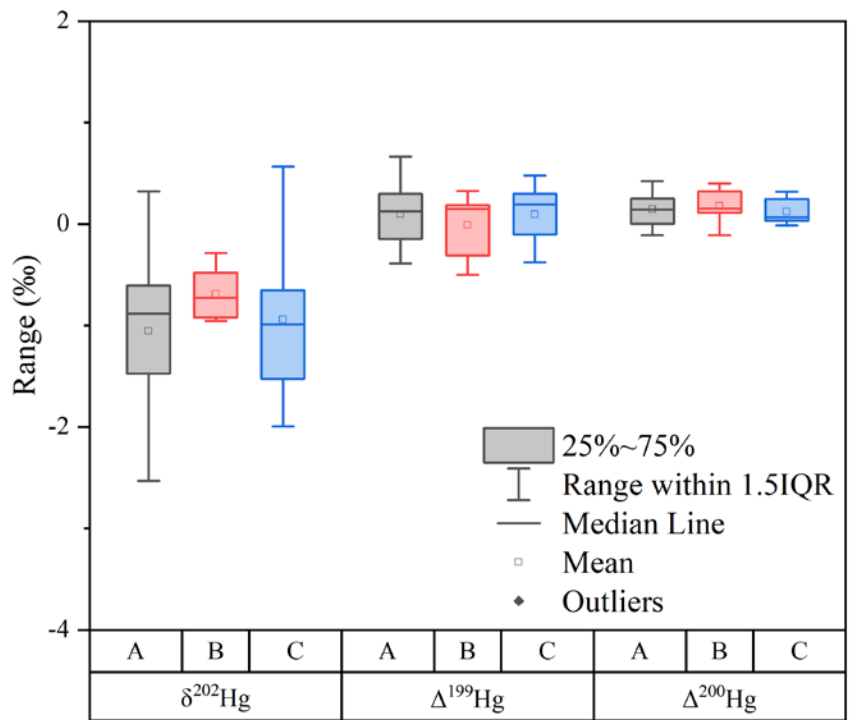

104 Figure S3. Box chart of PBM isotope signatures between different cruises.  
 105

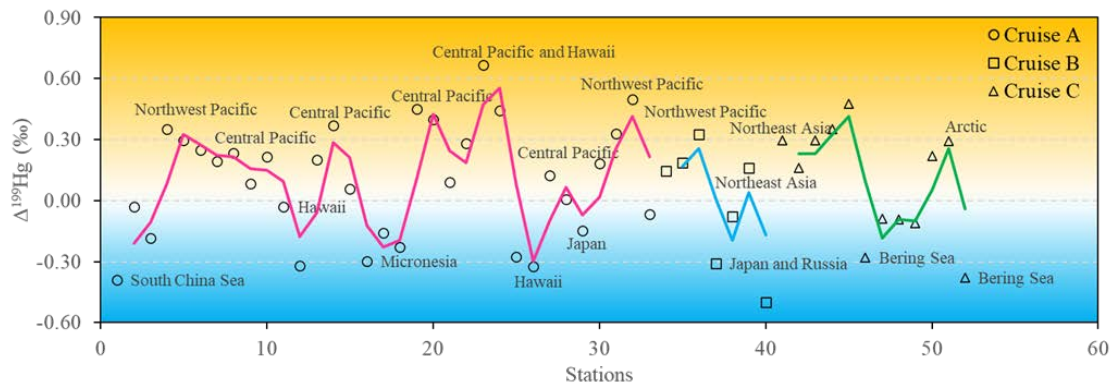

107 Figure S4. Variation in  $\Delta^{199}\text{Hg}$  values of PBM during the three cruises. The annotation behind  
 108 the point represents the potential source of the air mass at the station during sampling.  
 109  
 110

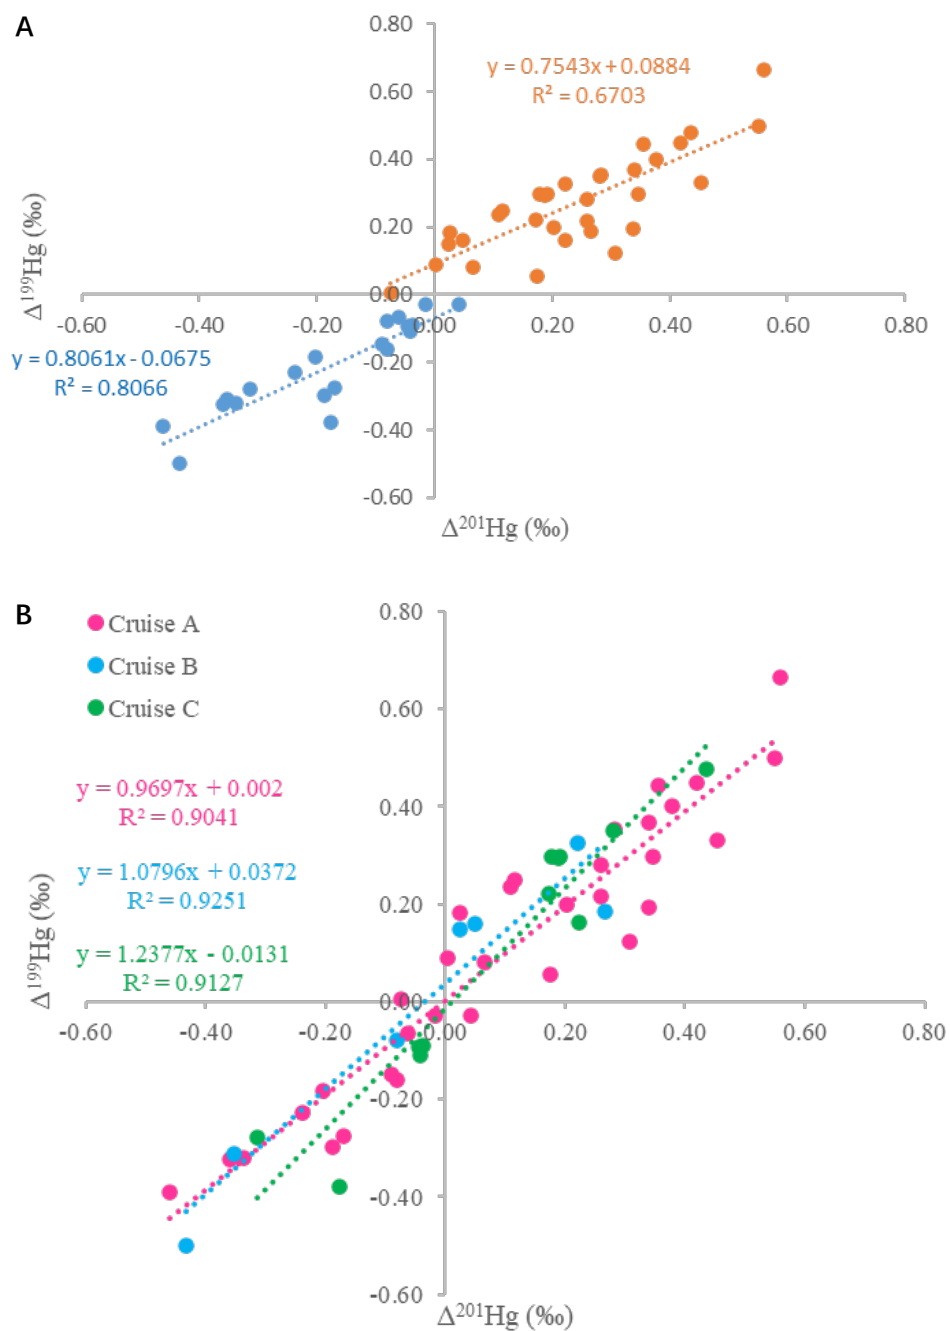

112 Figure S5. Plots of  $\Delta^{199}\text{Hg}$  vs.  $\Delta^{201}\text{Hg}$  for PBM with (A) positive and negative  $\Delta^{199}\text{Hg}$  values  
 113 and (B) different cruises.  
 114

115

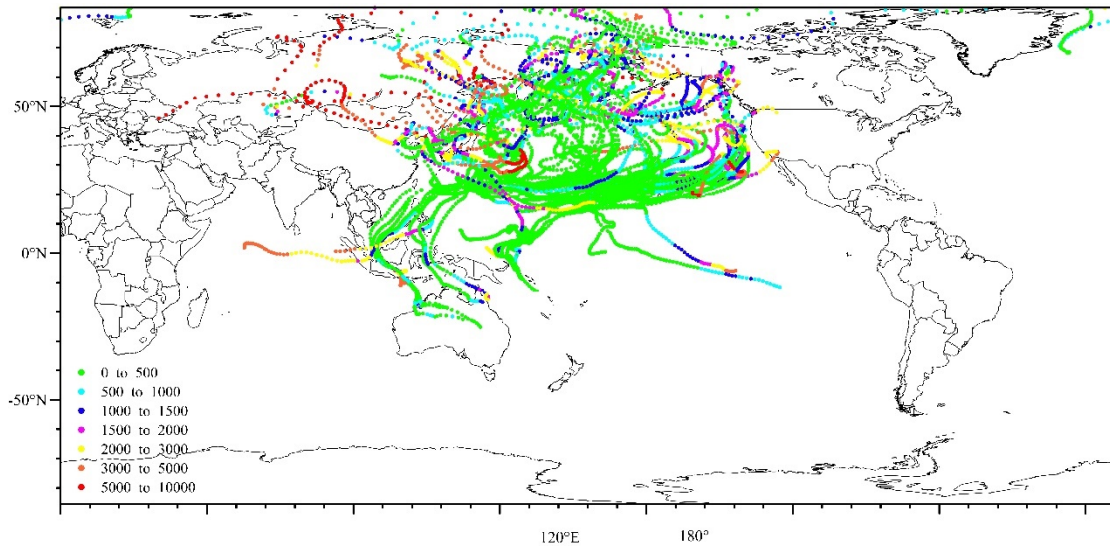

116

117

118

119

Figure S6. HYSPLIT trajectory analyses for each sampling sites in 13 days with overlap. Points of trajectories were calculated every 4 h.



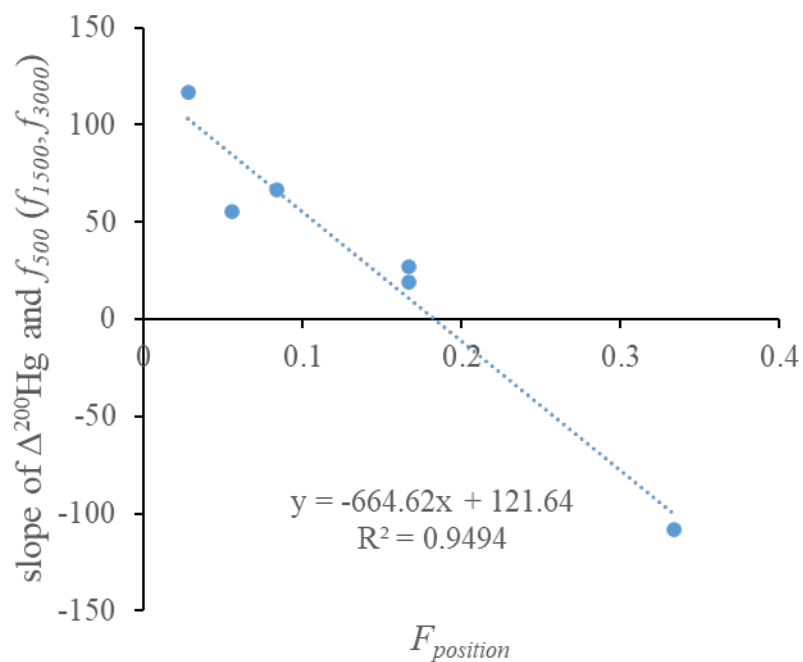

120

121 Figure S7. The relationship between  $\Delta^{200}\text{Hg}$  and altitudes. This is shown as the slope of  $\Delta^{200}\text{Hg}$  and  
 122  $f_{500}$  ( $f_{1500}, f_{3000}$ ) versus  $F_{\text{position}}$ .  $F_{\text{position}} = \text{height}/9000$  at high latitudes (Cruise B and C) and  $F_{\text{position}} =$   
 123  $\text{height}/18000$  at low latitudes (Cruise A), respectively. The slope is the ratios of  $f_{500}/\Delta^{200}\text{Hg}$ ,  
 124  $f_{1500}/\Delta^{200}\text{Hg}$ , and  $f_{3000}/\Delta^{200}\text{Hg}$ , as shown in Figure 6.

125

126  
127  
128  
129  
130  
131  
132  
133  
134  
135  
136  
137  
138  
139  
140  
141  
142  
143  
144  
145  
146  
147  
148  
149  
150  
151  
152  
153  
154  
155  
156  
157  
158  
159  
160  
161  
162  
163  
164  
165  
166

## References:

- 1 Huang, S. *et al.* Natural stable isotopic compositions of mercury in aerosols and wet precipitations around a coal-fired power plant in Xiamen, southeast China. *Atmos. Environ.* **173**, 72-80 (2018).
- 2 Huang, S. *et al.* Application of an isotope binary mixing model for determination of precise mercury isotopic composition in samples with low mercury concentration. *Anal. Chem.* **91**, 7063-7069 (2019).
- 3 Qiu, Y. *et al.* Identification of potential sources of elevated PM<sub>2.5</sub>-Hg using mercury isotopes during haze events. *Atmos. Environ.* **247**, 118203, doi:10.1016/j.atmosenv.2021.118203 (2021).
- 4 Huang, Q. *et al.* Diel variation of mercury stable isotope ratios record photoreduction of PM<sub>2.5</sub>-bound mercury. *Atmos. Chem. Phys.*, 315-325 (2019).
- 5 Zheng, W. *et al.* Mercury stable isotopes reveal the sources and transformations of atmospheric Hg in the high Arctic. *Appl. Geochem.* **131**, 105002, doi:10.1016/j.apgeochem.2021.105002 (2021).
- 6 Li, C. *et al.* Seasonal Variation of Mercury and Its Isotopes in Atmospheric Particles at the Coastal Zhongshan Station, Eastern Antarctica. *Environ Sci Technol* **54**, 11344-11355, doi:10.1021/acs.est.0c04462 (2020).
- 7 Fu, X. *et al.* Domestic and Transboundary Sources of Atmospheric Particulate Bound Mercury in Remote Areas of China: Evidence from Mercury Isotopes. *Environ. Sci. Technol.* **53**, 1947-1957 (2019).
- 8 Chen, J., Hintelmann, H., Feng, X. & Dimock, B. Unusual fractionation of both odd and even mercury isotopes in precipitation from Peterborough, ON, Canada. *Geochim. Cosmochim. Acta* **90**, 33-46 (2012).
- 9 Gratz, L., Keeler, G., Blum, J. & Sherman, L. Isotopic Composition and Fractionation of Mercury in Great Lakes Precipitation and Ambient Air. *Environ. Sci. Technol.* **44**, 7770 (2010).
- 10 Yuan, S. *et al.* Sequential samples reveal significant variation of mercury isotope ratios during single rainfall events. *Sci. Total Environ.* **624**, 133-144 (2018).
- 11 Demers, J., Blum, J. & Zak, D. Mercury isotopes in a forested ecosystem: Implications for air-surface exchange dynamics and the global mercury cycle. *Global Biogeochem. Cycles* **27**, 222-238 (2013).
- 12 Sherman, L., Blum, J., Keeler, G., Demers, J. & Dvonch, J. Investigation of Local Mercury Deposition from a Coal-Fired Power Plant Using Mercury Isotopes. *Environ. Sci. Technol.* **46**, 382-390 (2012).
- 13 Wang, Z. *et al.* Mass-dependent and mass-independent fractionation of mercury isotopes in precipitation from Guiyang, SW China. *C.R. Geosci.* **347**, 358-367 (2015).
- 14 Yu, B. *et al.* Isotopic Composition of Atmospheric Mercury in China: New Evidence for Sources and Transformation Processes in Air and in Vegetation. *Environ. Sci. Technol.* **50**, 9262-9269 (2016).
